# Supplementary material
Source: publisher site journal article supplement (https://www.dovepress.com/get_supplementary_file.php?f=321010.xlsx)
Supplement: Supplementary file 1 [file get_supplementary_file.php]

## Sheet: 1. Chemical constituents of QLP
1. Chemical constituents of QLP
No.	Identification	Structure
01	Citric acid	Fatty acids
02	Succinic acid	Fatty acids
03	1-O-β-D-glucopyranosyl-paeonisuffrone	Monoterpenes
04	Galloylsucrose	Phenolic acids
05	5-HMF	Others
06	Oxypaeoniflorin or isomers	Monoterpenes
07	Protocate chualdehyde	Others
08	3-Hydroxybenzoic acid	Phenolic acids
09	Isomaltopaeoniflorin or 6-O-d-glucopyranosylalbiflorin	Monoterpenes
10	Vicenin-2c(apigenin-6,8-di-C-glucoside)	flavonoids
11	Albiflorin	Monoterpenes
12	Magnoflorine	Alkaloids
13	Oxypaeoniflorin or isomers	Monoterpenes
14	Paeoniflorin	Monoterpenes
15	Ferulic acid	Phenolic acids
16	Mudanpioside I/Wurdin	Monoterpenes
17	2,3,5,4-tetrahydroxystilbene2-O-β-D-glucoside	Stilbene glucoside
18	Galloylpaeoniflorin or Galloylalbiflroin or their isomers	Monoterpenes
19	Naringin	flavonoids
20	Azelaic acid	Fatty acids
21	Hesperidin	flavonoids
22	Morusimic acid D or isomers	Alkaloids
23	Isopaeoniflorin	Monoterpenes
24	Albiflorin R1	Monoterpenes
25	Diphylloside A	flavonoids
26	Isomer salvianolic acid A	Phenolic acids
27	lactiflorin	Monoterpenes
28	Salvianolic acid B	Phenolic acids
29	Calycosin	flavonoids
30	Monohydroxytrimethoxyflavone	flavonoids
31	Epimedin C	flavonoids
32	Citrusin III	Others
33	Monohydroxypentamethoxyflavone	flavonoids
34	Hesperetin	flavonoids
35	Ikarisoside B	flavonoids
36	Monohydroxytetramethoxyflavone	flavonoids
37	Isosinensetin	flavonoids
38	Ikarisoside F	flavonoids
39	Cuse 3/α-Cus 3/β-Cus 3	Others
40	2’-O-Rhamnosylikarisoside A	flavonoids
41	Formononetin	flavonoids
42	Ikarisoside A	flavonoids
43	Astragalosides IV	triterpenoids
44	Sinensetin	flavonoids
45	Sagittatoside A	flavonoids
46	Icariside I	flavonoids
47	Limonol or isomers	triterpenoids
48	Sagittatoside B	flavonoids
49	2’-O-rhamnosylicariside II	flavonoids
50	Nobiletin	flavonoids
51	Ecliptasaponin A	triterpenoids
52	Icariside II	flavonoids
53	3,3',4',5,6,7,8-heptamethoxyflavone	flavonoids
54	Tangeretin	flavonoids
55	Epimedokoreanin D	flavonoids
56	Neocryptotanshinone	Diterpenoid quinones
57	Emodin	Anthraquinones
58	5-Hydroxy-6,7,8,3',4'-pentamethoxyflavone	flavonoids
59	1516-Dihydrotanshinone I	Diterpenoid quinones
60	30-norhederagenin	triterpenoids
61	6-Methylgingediol	Others
62	Icaritin	flavonoids
63	Cycloicaritin	flavonoids
64	Malonyl ursolic acid hemiester	triterpenoids
65	ursolic acid	triterpenoids
66	Acetylursolic acid	triterpenoids

## Sheet: 2. QLP targets
2. QLP targets
No.	QLP targets (gene symbol)
01	F10
02	PTGS2
03	AKR1B1
04	SRC
05	CTSD
06	IGHG1
07	NOS1
08	GRIN2A
09	GABRA1
10	GRIA2
11	PTPN1
12	CPB1
13	TPI1
14	GRIK2
15	HDC
16	ACLY
17	FDFT1
18	ABAT
19	GOT1
20	CDC25B
21	BCHE
22	ADH1B
23	ADH1C
24	ADH1A
25	GOT2
26	MAT1A
27	ME2
28	ME3
29	PRSS3
30	ALDH5A1
31	OAT
32	GLRA1
33	TXNRD1
34	ACAT2
35	GLUD1
36	OTC
37	AGXT
38	SDHA
39	MAT2A
40	P3H1
41	P3H3
42	OXCT2
43	SLC25A10
44	P4HA2
45	LSC2
46	CASP3
47	EGLN1
48	HTR2B
49	ADRA2A
50	ADRA2C
51	ADRA2B
52	DRD1
53	DRD2
54	ADRA1D
55	HTR2A
56	HTR2C
57	DRD3
58	CYP2D6
59	HTR6
60	ADRA1A
61	HTR1B
62	RORC
63	PRKCG
64	PRKCD
65	PRKCA
66	PRKCB
67	PRKCE
68	PRKCH
69	PRKCQ
70	TDP1
71	OPRK1
72	CHRM3
73	F2
74	CHRM1
75	GABRA2
76	ACHE
77	GABRA5
78	GABRA3
79	CHRM2
80	DPP4
81	PTGS1
82	GABRA6
83	HSP90AA1
84	LGALS3
85	LGALS9
86	AMY1A
87	SERPINE1
88	PTPN2
89	BACE1
90	SQLE
91	SLC6A2
92	SSTR5
93	SSTR2
94	SSTR4
95	SSTR1
96	SSTR3
97	ABCB1
98	VEGFA
99	FGF1
100	FGF2
101	HPSE
102	CHRNA7
103	ODC1
104	COMT
105	CA2
106	CA1
107	CA6
108	CA12
109	CA9
110	CA7
111	CA14
112	CA4
113	CA3
114	FUT7
115	CA5B
116	CA5A
117	CA13
118	TOP2
119	PTAFR
120	SELP
121	PPM1A
122	SLC6A3
123	HTR7
124	HTR1A
125	CHRNB2
126	CHRNA4
127	HTR5A
128	PTPRCAP
129	TH
130	DRD4
131	KCNH2
132	DRD5
133	HRH2
134	HTR1D
135	ADRB1
136	SLC6A4
137	ADRA1B
138	OPRM1
139	TNF
140	IL6
141	CD14
142	LBP
143	NOS3
144	ADRB2
145	DPEP1
146	LTA4H
147	MAOB
148	MAOA
149	PKIA
150	PSENEN
151	NCSTN
152	APH1A
153	APH1B
154	PSEN1
155	PSEN2
156	F7
157	CYP19A1
158	FABP4
159	PPARA
160	FABP3
161	FABP5
162	PPARD
163	FFAR1
164	FABP2
165	HSD11B1
166	SLC22A6
167	AR
168	VDR
169	NR1H4
170	POLB
171	CDC25A
172	GPBAR1
173	AKR1B10
174	KDM2A
175	PHF8
176	KDM5C
177	UGT2B7
178	SERPINA6
179	SHBG
180	HSD17B3
181	G6PD
182	GABBR1
183	BAX
184	ICAM1
185	VCAM1
186	TIAM2
187	LSS
188	UGCG
189	GBA
190	GBA2
191	ITGB3
192	ITGA2B
193	FUCA1
194	SLC18A3
195	PLA2G2C
196	PLA2G10
197	SLC1A2
198	PTGER4
199	PTGER2
200	PTGER3
201	MME
202	MGAM
203	GLB1
204	GAA
205	REN
206	SRD5A2
207	MAN2B1
208	CNR1
209	GANAB
210	SI
211	PLA2G2A
212	PLA2G1B
213	KISS1R
214	DNPEP
215	FUCA2
216	GANC
217	GLA
218	GLRA2
219	PDE5A
220	MMP9
221	MMP1
222	MMP12
223	MMP3
224	PRSS1
225	AKT1
226	CCND1
227	BCL2
228	CDKN1A
229	EIF6
230	COL7A1
231	FYN
232	TTR
233	MMP2
234	MMP13
235	ERBB2
236	EGFR
237	ESR1
238	LCK
239	MAPK1
240	AKR1C3
241	AKR1C4
242	AKR1C2
243	NOS2
244	PPARG
245	RXRA
246	PDE3A
247	ESR2
248	MAPK14
249	GSK3B
250	CDK2
251	CHEK1
252	PIM1
253	CCNA2
254	NCOA2
255	TYR
256	MIF
257	IL2
258	HSD17B2
259	CBR1
260	PTPRS
261	TLR9
262	ALDH2
263	ALOX12
264	TBXAS1
265	ADORA1
266	ADORA2A
267	HSD17B1
268	ESRRA
269	ESRRB
270	ABCG2
271	ADORA3
272	MCL1
273	NOX4
274	PLG
275	KIT
276	OPRD1
277	CYP1B1
278	XDH
279	APP
280	FLT3
281	ALOX5
282	ABCC1
283	AHR
284	ALOX15
285	MAPT
286	KDM4E
287	GPR35
288	AVPR2
289	TOP2A
290	IGF1R
291	INSR
292	AURKB
293	GLO1
294	MYLK
295	MPO
296	PIK3R1
297	DAPK1
298	PYGL
299	SYK
300	PTK2
301	KDR
302	PLK1
303	CDK1
304	PIK3CG
305	PKN1
306	CSNK2A1
307	MET
308	NEK2
309	CXCR1
310	CAMK2B
311	ALK
312	NEK6
313	AXL
314	APEX1
315	NUAK1
316	AKR1C1
317	AKR1A1
318	MPG
319	SLC22A12
320	PFKFB3
321	TERT
322	CYP1A1
323	CYP1A2
324	HLA-A
325	STAT3
326	CBX7
327	TACR1
328	XIAP
329	NTSR1
330	NTSR2
331	SCN5A
332	NCOA1
333	ABCC8
334	KCNMA1
335	CDK5
336	CDK5R1
337	CCNB1
338	CCNB2
339	CCNB3
340	PARP1
341	CD38
342	TNKS2
343	TNKS
344	TOP1
345	ARG1
346	PON1
347	STS
348	NQO2
349	RPS6KA3
350	NMUR2
351	GRK6
352	CDK6
353	CFTR
354	CASP9
355	JUN
356	TP53
357	MAPK8
358	TIMP1
359	CREB1
360	PLA2G4A
361	CD163
362	EPHB2
363	CDK4
364	HSPA5
365	HMOX1
366	IKBKB
367	NTRK2
368	IDO1
369	DHODH
370	FNTB
371	FNTA
372	PTPN22
373	FLT1
374	EGF
375	MYC
376	IL1B
377	CSF2
378	TGFB1
379	ACTA2
380	BTK
381	SLC2A4
382	FLT4
383	SLC2A1
384	PTP4A3
385	ELANE
386	FTO
387	LIMK1
388	FASN
389	CRHR1
390	DUSP3
391	LDHA
392	LDHB
393	HTR3A
394	CES1
395	PTPN6
396	CES2
397	PTPN11
398	TDP2
399	MALT1
400	CD81
401	PDE4D
402	PTPRF
403	ACP1
404	NR1H3
405	PTGES
406	PREP
407	HSD11B2
408	LTB4R
409	FAAH
410	FABP1
411	NR3C2
412	SCD
413	NR3C1
414	HMGCR
415	CYP51A1
416	NPC1L1
417	SIGMAR1
418	CYP17A1
419	PTGER1
420	PTGIR
421	PGR
422	MAPK3
423	RORA
424	PTGFR
425	PTGDR
426	UBA2
427	SAE1
428	ITGAL
429	POLA1
430	LYPLA1
431	LYPLA2
432	CNR2
433	MAP2K1
434	CYP24A1
435	ADCY10
436	GPER1
437	SLC5A2
438	GPR55
439	GPR18
440	CALM1
441	KDM1A
442	RCOR1
443	CHRM5
444	RXRB
445	PLAU
446	CTSB
447	RELA
448	BCL2L1
449	FOS
450	NFKBIA
451	CASP8
452	MMP10
453	SELE
454	ATF2
455	PECAM1
456	MAPK8IP2
457	BIRC5
458	GAP43
459	DUOX2
460	LITAF
461	CCND2
462	FASLG
463	CASP1
464	ENPP7
465	CYP2C19
466	GRIK1
467	NR1I3
468	EPAS1
469	CTRC
470	ATP12A
471	CDC25C
472	NLRP3
473	TBXA2R
474	TAS2R31

## Sheet: 3. POI targets
3. POI targets
No.	POI targets (gene symbol)
01	BRCA2
02	BRCA1
03	NR5A1
04	POF1B
05	TP53
06	BMP15
07	FOXL2
08	FSHR
09	NOBOX
10	INS
11	PTEN
12	FMR1
13	NBN
14	STAG3
15	POMC
16	FIGLA
17	CYP11A1
18	AKT1
19	ERCC6
20	IL6
21	NR0B1
22	ESR1
23	TP63
24	LMNA
25	GDF9
26	CYP19A1
27	WT1
28	CTNNB1
29	CYP17A1
30	HFM1
31	MCM8
32	ESR2
33	ALB
34	AMH
35	DIAPH2
36	STAR
37	GALT
38	EIF2B2
39	FGFR2
40	ATM
41	TERT
42	AMHR2
43	IL10
44	FGFR1
45	MCM9
46	LHCGR
47	POLG
48	PSMC3IP
49	KRAS
50	SYCE1
51	MIR146A
52	MSH5
53	TGFB1
54	PAEP
55	LARS2
56	AIRE
57	PIK3CA
58	EIF2B4
59	MRE11
60	MMP2
61	ERBB2
62	HSD17B4
63	SOX9
64	FAS
65	HNF1B
66	TGFBR2
67	IGF2
68	TLR4
69	BRAF
70	FANCM
71	KITLG
72	CYP21A2
73	TWIST1
74	IGF1
75	APOE
76	RAD51C
77	EGF
78	CCR6
79	CDKN2A
80	MTOR
81	GATA4
82	MYC
83	RAD51
84	INHBA
85	REN
86	FLT1
87	WNT4
88	RAD50
89	FSHB
90	EGFR
91	TGFBR1
92	IFNG
93	FGFR3
94	MLH1
95	PREPL
96	HRAS
97	PDGFRB
98	NOTCH1
99	FASLG
100	MMP1
101	MDM2
102	WRN
103	HSD3B2
104	KISS1R
105	SOHLH1
106	BLM
107	FBN1
108	MRPS22
109	CLPP
110	NF1
111	NUP107
112	SPP1
113	TNF
114	SGO2
115	SMAD3
116	GNRH1
117	FOS
118	ERCC1
119	FN1
120	VEGFA
121	SMAD4
122	TGFB3
123	PGR
124	AFF2
125	BMP4
126	PPARG
127	BMP2
128	MIR144
129	CHEK2
130	LOX
131	MAPK1
132	MIR21
133	KIT
134	CAV1
135	MMP14
136	H19
137	IGFBP3
138	TGFB2
139	CASP8
140	GJA1
141	STK11
142	CDH1
143	INHA
144	STAT1
145	BNC1
146	RB1
147	GNAS
148	AARS2
149	SRC
150	PRL
151	ATR
152	AR
153	ERCC2
154	CTSD
155	WDR19
156	INSR
157	RAF1
158	MIR17
159	ELN
160	SNAI2
161	JAK2
162	CXCL8
163	NFKB1
164	MIR126
165	MIR155
166	SHBG
167	POR
168	PDGFRA
169	SRY
170	ZMPSTE24
171	MIR483
172	IRS1
173	ITGB3
174	SQSTM1
175	MAP2K1
176	MET
177	ENG
178	PIK3R1
179	RAD51D
180	BUB1B
181	FGF8
182	APC
183	GLI3
184	CDKN3
185	HLA-A
186	MEG3
187	IL1B
188	LEP
189	CHEK1
190	DES
191	MC2R
192	CCN2
193	AKT2
194	MIR223
195	NPM1
196	SLC2A1
197	CRP
198	CDK4
199	CFTR
200	PTCH1
201	MIR27A
202	RHOA
203	MMP9
204	MIR140
205	FANCF
206	TWNK
207	AXIN1
208	PMM2
209	NTRK1
210	MIR210
211	GNRHR
212	FOXO3
213	CYP11B1
214	RUNX2
215	HMGA2
216	TERC
217	FST
218	PTH
219	ATP7A
220	ETS1
221	CTLA4
222	RFC2
223	GHR
224	MIR34A
225	CGA
226	MIR127
227	FANCC
228	PALB2
229	POU5F1
230	MIR22
231	CD46
232	MSX2
233	FGF2
234	FBLN5
235	H2AC18
236	HIF1A
237	CAT
238	CSF3
239	MIR221
240	AFP
241	ALPL
242	TPO
243	CDKN1C
244	EIF2B5
245	MUC1
246	HLA-DRB1
247	RECQL4
248	CEP290
249	MEN1
250	IL2
251	ACE
252	CCBE1
253	SERPINE1
254	VWF
255	SHH
256	RYR1
257	SMAD6
258	IGF1R
259	SEPTIN9
260	COL2A1
261	CASP3
262	ARID1B
263	MIRLET7D
264	KDR
265	TSC1
266	CCND1
267	EDN1
268	EP300
269	ASNS
270	KISS1
271	STAT3
272	LGR6
273	MFAP5
274	CDKN1A
275	SIRT1
276	TSC2
277	RET
278	MSH2
279	SMARCA4
280	PMS2
281	NOTCH2
282	RIN2
283	TIMP1
284	PARP1
285	DKC1
286	SPINK1
287	REC8
288	LRP5
289	BSCL2
290	PAX2
291	IFT140
292	IFT122
293	ABCB1
294	PTPN22
295	ICAM1
296	TG
297	MIR139
298	TTN
299	FOXP2
300	CASR
301	ACTA2
302	SOX3
303	VCP
304	ABCA3
305	TTC21B
306	BRIP1
307	PTPN11
308	NPHP1
309	TTR
310	NPHP4
311	IL4
312	GK
313	CD2AP
314	ERAL1
315	IL1A
316	IGFBP1
317	TIMP2
318	MIRLET7C
319	PTGS2
320	IHH
321	CSF2
322	KRT7
323	SOD2
324	EPPIN
325	ABCD1
326	NPHP3
327	OFD1
328	NKX2-5
329	PGRMC1
330	PAX3
331	INHBB
332	SHOX
333	FGF10
334	GH1
335	MSH6
336	IL17A
337	APOA1
338	RETN
339	EIF2B3
340	EIF2B1
341	DICER1
342	CCL2
343	FRAXA
344	DSTYK
345	PRKCD
346	JUN
347	COL1A1
348	DACH2
349	APOB
350	PLAU
351	BMP6
352	TNFSF11
353	RCBTB1
354	LIG4
355	MTHFR
356	ZP3
357	CFAP47
358	EPO
359	VDR
360	HP
361	ANGPT2
362	ACTN4
363	INVS
364	HLA-B
365	MSH4
366	POLR3A
367	RELA
368	ALPP
369	NANOS3
370	CDH23
371	SOHLH2
372	BDNF
373	BARD1
374	MUC16
375	FLNA
376	IGF2R
377	MME
378	TWIST2
379	SERPINA3
380	DAZL
381	BGLAP
382	CYP11B2
383	SMC1A
384	KDM6A
385	IGFBP2
386	ADIPOQ
387	MAP3K1
388	COL1A2
389	ANXA5
390	ZIC3
391	MIR145
392	LHX8
393	TRAF3IP1
394	PRKD1
395	F2
396	USP8
397	HELLS
398	TNNT2
399	VIM
400	TNFRSF1A
401	ADAMTS19
402	FGF1
403	GALK1
404	ERBB3
405	ENO1
406	WWOX
407	SUFU
408	FGF9
409	TOP1
410	ATRX
411	SPO11
412	JAG1
413	ABCB4
414	TEK
415	EPRS1
416	GAPDH
417	HGF
418	GPR3
419	ALX4
420	EFNB1
421	NLRP5
422	CD19
423	FANCA
424	CD44
425	SOX10
426	DDX4
427	CYCS
428	LDB3
429	NUP133
430	EIF4ENIF1
431	TMEM67
432	MT-CYB
433	CD40LG
434	DMRT1
435	TMEM216
436	IQCB1
437	NFKB2
438	FGF7
439	MAPK14
440	FOXE3
441	ACTC1
442	ZP2
443	GSTP1
444	XPNPEP2
445	KIF7
446	PRKAR1A
447	TCF12
448	BCL2L1
449	MMP7
450	CLU
451	CEP164
452	LIMK1
453	RECQL
454	USP9X
455	SDCCAG8
456	CBL
457	POLR3H
458	IFT172
459	ANGPT1
460	MAPK8
461	CCL5
462	VEGFC
463	MAPK3
464	MIR125A
465	COL3A1
466	PRKN
467	SMC1B
468	APEX1
469	CXCL12
470	CPEB1
471	SYNE2
472	CYP3A4
473	CYP1A2
474	COMT
475	ABCC3
476	ABCC4
477	ABCC1
478	SLCO1A2
479	SLC10A1
480	SLC22A10
481	SLC22A8
482	SLCO1C1
483	SLCO1B1
484	SLCO2B1
485	SLC22A6
486	SLC51A
487	SLC51B
488	ABCC2
489	SLCO4A1
490	ABCC11
491	SLCO1B3
492	SLC22A11
493	SLCO3A1
494	ABCG2
495	SERPINA7
496	NR1I2
497	UGT1A1
498	FABP2
499	CYP3A5
500	CYP3A7
501	SLC22A2
502	SLC22A3
503	ABCC10
504	CYP1A1
505	CYP1B1
506	CYP2C19
507	CYP2C8
508	CYP2C9
509	CHRNA4
510	GPER1
511	MT-ATP6
512	BECN1
513	UGT2B15
514	SLC22A1
515	NCOA2
516	HSD17B2
517	ESRRG
518	SLC47A1
519	SLC47A2
520	BMPR1B
521	FOXO4
522	BMPR1B-DT
523	NR1H4
524	DGAT2
525	CYP8B1
526	NR1H3
527	HMGCR
528	CIDEB
529	ACAT2
530	SPIDR
531	MCM3AP
532	B4GALNT1
533	CASTOR3
534	RASGRP1
535	BRD2
536	CASP10
537	PTH2R
538	DCAF17
539	PIK3CD
540	PIK3CG
541	PIK3CB
542	TGFBR3
543	SALL4
544	FRAXE
545	MSC
546	PSMD9
547	TMED7
548	TICAM2
549	CD38
550	BMPR2
551	IFI27
552	HTC2
553	SEMA6C
554	FOXE1
555	DCTN6
556	H3P23
557	CYP2B6
558	DMC1
559	HARS2
560	TMED7-TICAM2
561	PGR-AS1
562	AGTR2
563	ZNRD2
564	CDKN1B
565	MIR644A
566	TAF4B
567	TAGLN
568	MIR449B
569	PRDX2
570	TIMM8A
571	ADAMTS16
572	RPS26
573	RPL10
574	GAS5
575	DLX5
576	ACTB
577	POU5F1P3
578	DDX3X
579	CSF1R
580	CYB5A
581	SKP2
582	CYP7A1
583	POU5F1P4
584	ABRAXAS1
585	HACD1
586	EXO1
587	SELENBP1
588	EIF2S2
589	CER1
590	SH2B2
591	FMR1-IT1
592	KHDRBS1
593	NOG
594	CITED2
595	TLK1
596	CDK1
597	PUM1
598	CD63
599	KL
600	ACVR2B
601	PER2
602	TCFL5
603	CALCA
604	CXCR4
605	RGPD2
606	TYMS
607	LIN28A
608	HDX
609	CBX2
610	SPATA22
611	HELQ
612	BRSK1
613	DBH
614	OSR2
615	TSHB
616	BCKDHB
617	GADD45B
618	MIR190A
619	MIR181A2
620	MIR15B
621	MIR15A
622	GC
623	GCG
624	NPAS4
625	MIR27B
626	TRIM37
627	MTRR
628	MEIOB
629	XRCC6
630	CNTNAP2
631	MIR30D
632	LIF
633	LHB
634	WDR62
635	TMEM150B
636	SENP1
637	KLK3
638	AGFG2
639	STRA8
640	PDCD4
641	INSL3
642	LGALS1
643	LAMC1
644	MAP3K15
645	TBPL2
646	BBS9
647	IL21
648	PRLR
649	NXF5
650	PRIM1
651	CHDH
652	PACC1
653	NUDT11
654	ERN1
655	BAX
656	C6orf47
657	DLX6
658	XPO5
659	S1PR1
660	MIR518C
661	MEGF8
662	AHR
663	F9
664	GAL
665	FAM215A
666	OXA1L
667	MIR379
668	NPY2R
669	PCMT1
670	PCSK1
671	DKK1
672	POLD1
673	FOXO1
674	PLA2G4A
675	ACSL6
676	PER1
677	PDPK1
678	VTA1
679	HOTAIR

## Sheet: 4. Common targets
4. Common targets
No.	Common targets (gene symbol)
01	ABCB1
02	ABCC1
03	ABCG2
04	ACAT2
05	ACTA2
06	AHR
07	AKT1
08	APEX1
09	AR
10	BAX
11	BCL2L1
12	CASP3
13	CASP8
14	CCND1
15	CD38
16	CDK1
17	CDK4
18	CDKN1A
19	CFTR
20	CHEK1
21	CHRNA4
22	COMT
23	CSF2
24	CTSD
25	CYP17A1
26	CYP19A1
27	CYP1A1
28	CYP1A2
29	CYP1B1
30	CYP2C19
31	EGF
32	EGFR
33	ERBB2
34	ESR1
35	ESR2
36	F2
37	FABP2
38	FASLG
39	FGF1
40	FGF2
41	FLT1
42	FOS
43	GPER1
44	HLA-A
45	HMGCR
46	HSD17B2
47	ICAM1
48	IGF1R
49	IL1B
50	IL2
51	IL6
52	INSR
53	ITGB3
54	JUN
55	KDR
56	KISS1R
57	KIT
58	LIMK1
59	MAP2K1
60	MAPK1
61	MAPK14
62	MAPK3
63	MAPK8
64	MET
65	MME
66	MMP1
67	MMP2
68	MMP9
69	MYC
70	NCOA2
71	NR1H3
72	NR1H4
73	PARP1
74	PGR
75	PIK3CG
76	PIK3R1
77	PLA2G4A
78	PLAU
79	PPARG
80	PRKCD
81	PTGS2
82	PTPN11
83	PTPN22
84	RELA
85	REN
86	SERPINE1
87	SHBG
88	SLC22A6
89	SLC2A1
90	SRC
91	STAT3
92	TERT
93	TGFB1
94	TIMP1
95	TNF
96	TOP1
97	TP53
98	TTR
99	VDR
100	VEGFA
